# Supplementary material for: Surface P atom grafting of g-C3N4 for improved local spatial charge separation and enhanced photocatalytic H2 production
Source: Royal Society of Chemistry journal article supplement (doi:10.1039/c9ta00129h), 2019-01-01
Supplement: c9ta00129h1.pdf [file c9ta00129h1.pdf]

## Support Information

### Surface P-N bonds induced local spatial charge separation and enhanced photocatalytic hydrogen production in graphitic carbon nitride

Xiao Tian,<sup>a</sup> Ying-jie Sun,<sup>a</sup> Jiang-yan He,<sup>a</sup> Xiao-jing Wang,<sup>a</sup> Zhao Jun,<sup>a</sup> Shi Zhang Qiao<sup>b</sup> and Fa-tang Li<sup>\*a</sup>

<sup>a</sup> College of Science, Hebei University of Science and Technology, Shijiazhuang, 050018, China. Email: lifatang@126.com; propyl@163.com.

<sup>b</sup> School of Chemical Engineering, University of Adelaide, Adelaide, SA 5005, Australia.

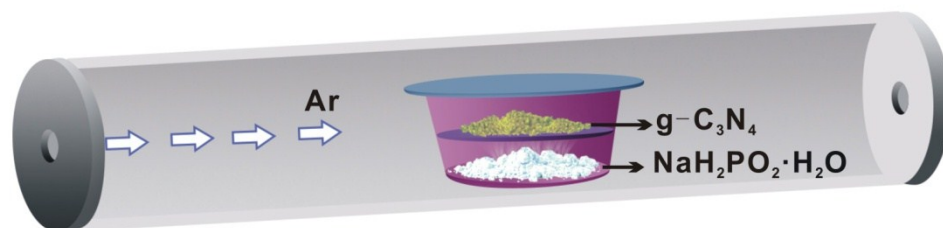

Fig. S1 The process for preparation of P-N bond modified  $g\text{-C}_3\text{N}_4$  in the tube furnace.

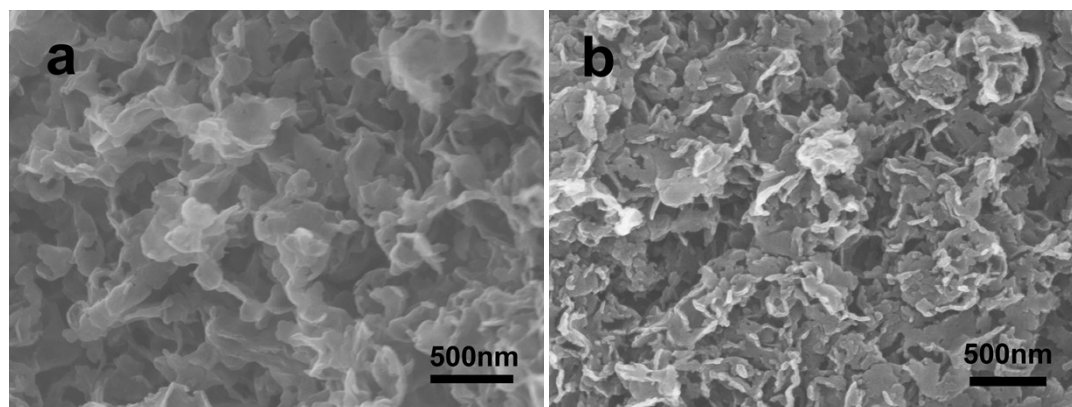

Fig. S2 SEM images of (a)CN and (b) PCN-2

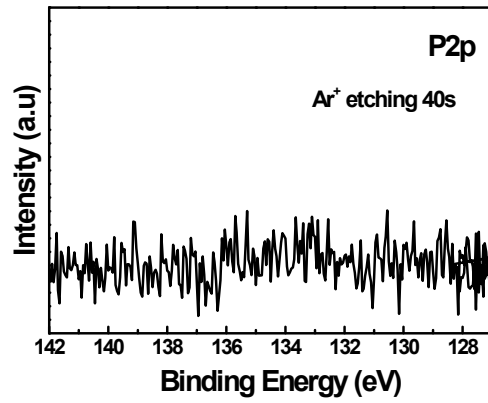

Fig. S3 P 2p spectra of PCN-2 after Ar<sup>+</sup> for 40s

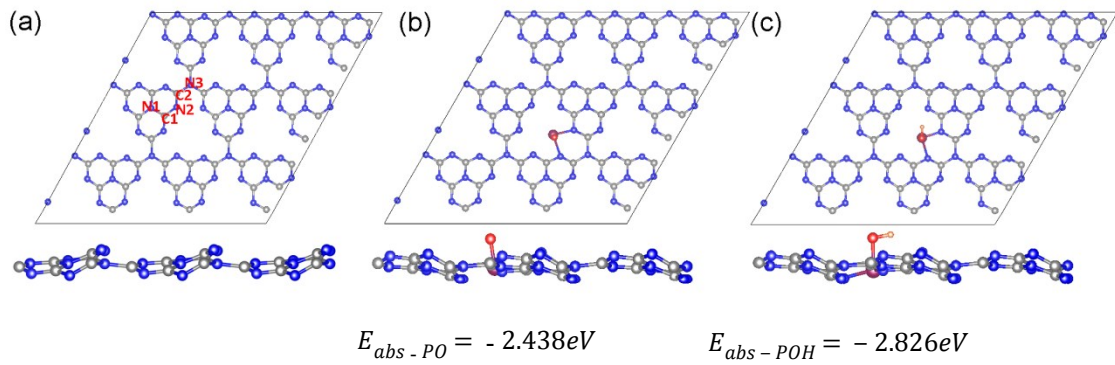

Fig. S4 (a)Ball-and-stick model of monolayer from top and side views (a) g-C<sub>3</sub>N<sub>4</sub>, (b)P=O doped g-C<sub>3</sub>N<sub>4</sub>, (c)P-OH doped g-C<sub>3</sub>N<sub>4</sub>.

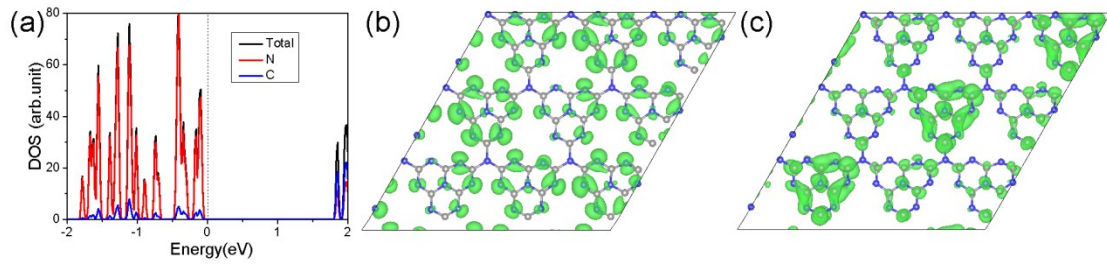

Fig. S5 (a) PDOS of monolayer g-C<sub>3</sub>N<sub>4</sub>, and band decomposed charge density of (b) VBM and (c) CBM of monolayer g-C<sub>3</sub>N<sub>4</sub>, respectively. The isovalue is 0.0007 au

**Table S1** The surface N/P atomic ratio and yield of the PCN samples tested by XPS

| Sample               | N/P atomic ratio | Yield of post-calcination |
|----------------------|------------------|---------------------------|
| PCN-1 (1:5-400-3h)   | 100:1            | 78%                       |
| PCN-2 (1:7.5-400-3h) | 79:1             | 70%                       |
| PCN-3 (1:10-400-3h)  | 75:1             | 67%                       |
| PCN-4 (1:7.5-300-3h) | 123:1            | 96%                       |
| PCN-5 (1:7.5-350-3h) | 110:1            | 95%                       |
| PCN-6 (1:7.5-450-3h) | 68:1             | 65%                       |
| PCN-7 (1:7.5-400-2h) | 85:1             | 75%                       |
| PCN-8 (1:7.5-400-4h) | 71:1             | 67%                       |

**Table S2** The performance comparison of the catalysts from the different references.

| Catalyst                                                       | AQE at 420nm | Photocatalytic H <sub>2</sub> evolution Rate ( $\mu\text{mol}\cdot\text{h}^{-1}\cdot\text{g}^{-1}$ ) | Amount of photocatalyst (mg) | Reference |
|----------------------------------------------------------------|--------------|------------------------------------------------------------------------------------------------------|------------------------------|-----------|
| Surface P-N bonds modified g-C <sub>3</sub> N <sub>4</sub>     | 8.96%        | 1.8mmol·h <sup>-1</sup> ·g <sup>-1</sup>                                                             | 30                           | This work |
| P -Doped C <sub>3</sub> N <sub>4</sub> nanosheet               | 3.56%        | 1596 $\mu\text{mol}\cdot\text{h}^{-1}\cdot\text{g}^{-1}$                                             | 50                           | 1         |
| P-doped g-C <sub>3</sub> N <sub>4</sub> hexagonal microtubes   | 5.68%        | 670 $\mu\text{mol}\cdot\text{h}^{-1}\cdot\text{g}^{-1}$                                              | 100                          | 2         |
| Carbon rich g-C <sub>3</sub> N <sub>4</sub>                    | 4.52%        | 39.6 $\mu\text{mol}\cdot\text{h}^{-1}$                                                               | 10                           | 3         |
| P and cyano groups modified g-C <sub>3</sub> N <sub>4</sub>    | 1.3%         | 77.9 $\mu\text{mol}\cdot\text{h}^{-1}\cdot\text{g}^{-1}$                                             | 100                          | 4         |
| Surface hydroxylation modified g-C <sub>3</sub> N <sub>4</sub> | 9.2%         | 0.31 mmol·h <sup>-1</sup> ·g <sup>-1</sup>                                                           | 50                           | 5         |
| Carbon-doped g-C <sub>3</sub> N <sub>4</sub>                   | 6.8%         | 125.1 $\mu\text{mol}\cdot\text{h}^{-1}\cdot\text{g}^{-1}$                                            | 20                           | 6         |
| non-metal group doping g-C <sub>3</sub> N <sub>4</sub>         | 7.45%        | ≈1.3 mmol·h <sup>-1</sup> ·g <sup>-1</sup>                                                           | 100                          | 7         |
| P, Na Co-doping g-C <sub>3</sub> N <sub>4</sub>                | -            | 114.2 $\mu\text{mol}\cdot\text{h}^{-1}$                                                              | 50                           | 8         |
| Ammonia etching g-C <sub>3</sub> N <sub>4</sub>                | -            | 317.6 $\mu\text{mol}\cdot\text{h}^{-1}$                                                              | 50                           | 9         |
| P-doped g-C <sub>3</sub> N <sub>4</sub> nanotubes              | -            | 303.97 $\mu\text{mol}\cdot\text{h}^{-1}\cdot\text{g}^{-1}$                                           | 30                           | 10        |

### References

1. J. R. Ran, T. Y. Ma, G. P. Gao, X. W. Du, and S. Z. Qiao. *Energy. Environ. Sci.*, 2015, 8, 3708-3717.
2. S. Guo, Z. Deng, M. Li, B. Jiang, C. Tian, Q. Pan and H. Fu, *Angew. Chem. Int. Ed.*, 2016, 55, 1830-1834.
3. Y. F. Li, M. Yang, Y. Xing, Z. C. Liu, Y. Yang, X. Wang, and S. Y. Song. *Small.*, 2017, 13, 1701552.
4. X. L. Liu, P. Wang, H. S. Zhai, Q. Q. Zhang, B. B. Huang, Z. Y. Wang, Y. Y. Liu, Y. Dai, X. Y.

- Qin, and Z. Y. Zhang. *Appl. Catal. B-Environ.*, 2018, 232, 521-530.
5. S. X. Yu, J. Y. Li, Y. H. Zhang, M. Li, F. Dong, T. R. Zhang and H. W. Huang, *Nano. Energy*, 2018, 50, 383-392.
6. Z. Chen, T. Fan, X. Yu, Q. L. Wu, Q. Zhu, L. Zhang, J. Li, W. Fang and X.D. Yi, *J. Mater. Chem. A*, 2018,6, 15310-15319.
7. W. Xing, G. Chen, C. Li, Z. Han, Y. Hu and Q. Meng, *Nanoscale.*, 2018,10, 5239-5245
8. S. W. Cao, Q. Huang, B. C. Zhu and J. G. Yu, *J. Power. Sources.*, 2017, 351, 151-159.
9. P. J. Yang, J. H. Zhao, W. Qiao, L. Li, and Z. P. Zhu, *Nanoscale.*, 2015, 7, 18887-18890.
10. B. Liu, L. Q. Ye, R. Wang, J. F. Yang, Y. X. Zhang, R. Guan, L. H. Tian and X. B. Chen, *Acs Appl. Mater. Inter.*, 2018, 10, 4001-4009.
